# Supplementary material
Source: PubMed Central journal article supplement (PMC4211932)
Supplement: NIHMS635256-supplement-Supplemental_Data.pdf [file NIHMS635256-supplement-Supplemental_Data.pdf]

SUPPLEMENTARY DATA

Supplementary eTable 1. Demographics: Control and BD groups

| Characteristic                            | Control (n=156) | BD (N=412)   | p                   |
|-------------------------------------------|-----------------|--------------|---------------------|
| Migraine, n(%)                            | 10 (6)          | 127 (31)     | <1x10 <sup>-3</sup> |
| Female, n(%)                              | 86 (55)         | 270 (66)     | .03                 |
| Female with migraine<br>(n,% of migraine) | 9 (90)          | 105 (83)     | 1x10 <sup>-6</sup>  |
| Age, mean (SD)                            | 33 (14)         | 40 (13)      | <1x10 <sup>-3</sup> |
| BMI, mean (SD)                            | 25.5 (5.7)      | 29.1 (6.7)   | 1x10 <sup>-6</sup>  |
| Migraine AAO <sup>a</sup> , mean (SD)     | 18.20 (10.7)    | 22.35 (12.2) | .30                 |

<sup>a</sup>AAO: Age at onset

Supplementary eTable 2. Medication use in BD group: Comparing Those With And Without Migraine

| Medication               | No migraine<br>(n=285) | Migraine<br>(n=127) | p                    |
|--------------------------|------------------------|---------------------|----------------------|
| Valproic Acid, n(%)      | 120 (24)               | 55 (37)             | $2 \times 10^{-3}$   |
| Topiramate, n(%)         | 23 (5)                 | 23 (16)             | $6 \times 10^{-6}$   |
| Gabapentin, n(%)         | 37 (8)                 | 26 (18)             | $2.5 \times 10^{-4}$ |
| SSRI, n(%)               | 178 (63)               | 94 (74)             | 0.02                 |
| SNRI <sup>a</sup> , n(%) | 68 (24)                | 44 (35)             | 0.02                 |
| TCA, n(%)                | 40 (14)                | 38 (30)             | $< 1 \times 10^{-3}$ |
| MAOI, n(%)               | 4 (1)                  | 1 (1)               | 0.51 (exact)         |

<sup>a</sup>AD tested for associated with RC: SNRI associated with RC in both groups ( $p < 3 \times 10^{-3}$ ), TCA and SSRI are not ( $p > .36$ ).

Supplementary eTable 3a. Clinical Characteristics in BD Group by Gender and BD diagnosis: Comparing BPI women With And Without Migraine

| Characteristic                     | No migraine<br>(n=123 ) | Migraine<br>(n= 69) | p <sup>a</sup> |
|------------------------------------|-------------------------|---------------------|----------------|
| Rapid cycling, n(%)                | 47 (38)                 | 25 (36)             | 0.79           |
| Mixed Symptoms, n(%)               | 53 (46)                 | 34 (56)             | 0.22           |
| Mixed Episodes, n(%)               | 38 (33)                 | 26 (43)             | 0.21           |
| Psychosis, n(%)                    | 78 (68)                 | 40 (61)             | 0.33           |
| Suicide attempts, n(%)             | 52 (43)                 | 36 (52)             | 0.22           |
| Anxiety disorder, n(%)             | 50 (41)                 | 27 (39)             | 0.84           |
| Alcohol use disorder, n(%)         | 49 (40)                 | 31 (45)             | 0.49           |
| Drug use disorder, n(%)            | 8 (7)                   | 12 (17)             | 0.02           |
| Manic episodes, median (IQR)       | 3 (5)                   | 3 (12)              | 0.27           |
| Depressive episodes, median (IQR)  | 5 (16)                  | 10 (27)             | <0.01          |
| Hypomanic episodes, median (IQR)   | 4 (20)                  | 6 (24)              | 0.47           |
|                                    | (n=67)                  | n=(37)              | p              |
| AAO, mean (SD)                     | 17.61 (6.57)            | 15.92 (7.55)        | 0.24           |
| BMI, mean (SD)                     | 28.63 (7.59)            | 31.45 (9.31)        | 0.11           |
| Baseline depression, mean (SD)     | 12.73 (11.11)           | 17.81 (14.26)       | 0.06           |
| Baseline mania, mean (SD)          | 2.75 (3.84)             | 3.03 (3.99)         | 0.73           |
| CTQ emotional abuse, mean (SD)     | 12.61 (6.13)            | 14.11 (6.22)        | 0.24           |
| CTQ physical abuse, mean (SD)      | 8.24 (4.75)             | 9.08 (4.93)         | 0.40           |
| CTQ sexual abuse, median (IQR)     | 5 (4)                   | 7 (14)              | 0.05           |
| CTQ emotional neglect, mean (SD)   | 12.43 (5.94)            | 14.38 (5.89)        | 0.11           |
| CTQ physical neglect, mean (SD)    | 8.84 (2.79)             | 8.76 (2.73)         | 0.89           |
| FACES II cohesion, mean (SD)       | 3.97 (2.15)             | 3.32 (1.99)         | 0.14           |
| FACES II adaptability, mean (SD)   | 3.81 (2.16)             | 3.19 (2.00)         | 0.16           |
| LEOS Undesirable events, mean (SD) | 2.27 (2.45)             | 2.14 (2.04)         | 0.78           |
| LEC life events scale, mean (SD)   | 4.06 (3.09)             | 4.38 (2.92)         | 0.61           |
| Neuroticism, mean (SD)             | 60.18 (14.65)           | 62.81 (12.74)       | 0.36           |
| Extraversion, mean (SD)            | 50.18 (11.49)           | 46.86 (12.66)       | 0.18           |
| Openness, mean (SD)                | 58.25 (12.27)           | 56.51 (14.68)       | 0.52           |
| Agreeableness, mean (SD)           | 49.58 (12.29)           | 44.78 (12.14)       | 0.06           |
| Conscientiousness, mean (SD)       | 43.03 (14.43)           | 41.70 (11.52)       | 0.63           |

Abbreviations: Childhood Trauma Questionnaire (CTQ); Life Events Occurrence Survey (LEOS); Life Events Checklist (LEC); Family Adaptability and Cohesion Evaluation Scale II (FACES II); Neuroticism, Extraversion, Openness, Agreeableness and Conscientiousness from the Five Factor model NEO-Personality Index – Revised (NEO-PI-R). Baseline depression symptoms were measured with the Hamilton Depression Rating Scale (HDRS-29), baseline manic symptoms were measured with the Young Mania Rating Scale (YMRS).

<sup>a</sup> comparisons between groups done using independent sample t-test for normally distributed continuous variables, and the Mann-Whitney U test for non-normally distributed continuous

variables (manic, depressive, and hypomanic episodes, CTQ sexual abuse); Pearson Chi-square used for categorical variables.

Supplementary eTable 3b. Clinical Characteristics in BD Group by Gender and BD diagnosis: Comparing BPI Men With And Without Migraine

| BPI MEN: Characteristic            | (n=100)       | (n=14)        | p <sup>a</sup> |
|------------------------------------|---------------|---------------|----------------|
| Rapid Cycling, n(%)                | 26 (26)       | 9 (64)        | <0.01          |
| Mixed Symptoms, n(%)               | 32 (36)       | 8 (62)        | 0.07           |
| Mixed Episodes, n(%)               | 25 (28)       | 5 (39)        | 0.52           |
| Psychosis, n(%)                    | 67 (71)       | 11 (79)       | 0.75           |
| Suicide Attempts, n(%)             | 25 (25)       | 4 (29)        | 0.76           |
| Anxiety Disorder, n(%)             | 27 (27)       | 5 (36)        | 0.53           |
| Alcohol Use Disorder, n(%)         | 56 (56)       | 5 (36)        | 0.15           |
| Drug Use Disorder, n(%)            | 26 (26)       | 3 (21)        | 0.71           |
| Manic episodes, median (IQR)       | 3 (5)         | 4 (11)        | 0.56           |
| Depressive episodes, median (IQR)  | 4 (12)        | 6.5 (50)      | 0.20           |
| Hypomanic episodes, median (IQR)   | 1 (22)        | 17.5 (48)     | 0.08           |
|                                    | (n=45)        | n=(9)         | p              |
| AAO, mean (SD)                     | 21.07 (11.05) | 14.44 (3.81)  | 0.08           |
| BMI, mean (SD)                     | 30.19 (5.73)  | 29.89 (8.44)  | 0.90           |
| Baseline depression, mean (SD)     | 9.29 (8.73)   | 16.89 (11.63) | 0.30           |
| Baseline mania, mean (SD)          | 3.62 (6.73)   | 3.89 (4.22)   | 0.91           |
| CTQ emotional abuse, mean (SD)     | 9.67 (4.59)   | 10.89 (6.13)  | 0.49           |
| CTQ physical abuse, mean (SD)      | 7.82 (3.30)   | 8.67 (5.75)   | 0.54           |
| CTQ sexual abuse, median (IQR)     | 5 (5)         | 5 (10)        | 0.90           |
| CTQ emotional neglect, mean (SD)   | 11.00 (5.01)  | 11.89 (6.37)  | 0.65           |
| CTQ physical neglect, mean (SD)    | 8.67 (2.31)   | 8.89 (3.89)   | 0.82           |
| FACES II cohesion, mean (SD)       | 4.20 (2.07)   | 3.67 (1.66)   | 0.47           |
| FACES II adaptability, mean (SD)   | 4.29 (1.87)   | 3.22 (1.30)   | 0.11           |
| LEOS Undesirable events, mean (SD) | 1.87 (2.28)   | 2.00 (2.50)   | 0.88           |
| LEC life events scale, mean (SD)   | 4.51 (3.27)   | 6.33 (4.21)   | 0.15           |
| Neuroticism, mean (SD)             | 59.18 (12.68) | 67.89 (11.71) | 0.06           |
| Extraversion, mean (SD)            | 50.96 (11.52) | 43.78 (12.14) | 0.10           |
| Openness, mean (SD)                | 54.49 (11.39) | 58.11 (8.18)  | 0.37           |
| Agreeableness, mean (SD)           | 50.82 (11.89) | 49.33 (13.23) | 0.74           |
| Conscientiousness, mean (SD)       | 44.91 (13.52) | 47.67 (19.29) | 0.61           |

Abbreviations: Childhood Trauma Questionnaire (CTQ); Life Events Occurrence Survey (LEOS); Life Events Checklist (LEC); Family Adaptability and Cohesion Evaluation Scale II (FACES II); Neuroticism, Extraversion, Openness, Agreeableness and Conscientiousness from the Five Factor model NEO-Personality Index – Revised (NEO-PI-R). Baseline depression symptoms were measured with the Hamilton Depression Rating Scale (HDRS-29), baseline manic symptoms were measured with the Young Mania Rating Scale (YMRS).

<sup>a</sup> comparisons between groups done using independent sample t-test for normally distributed continuous variables, and the Mann-Whitney U test for non-normally distributed continuous variables (manic, depressive, and hypomanic episodes, CTQ sexual abuse); Pearson Chi-square used for categorical variables.

Supplementary eTable 3c. Clinical Characteristics in BD Group by Gender and BD diagnosis: Comparing BPII Women With And Without Migraine

|                                    | No migraine   | Migraine      |                |
|------------------------------------|---------------|---------------|----------------|
| Characteristic                     | (n=25)        | (n=22)        | p <sup>a</sup> |
| Rapid cycling, n(%)                | 7 (28)        | 11 (50)       | 0.12           |
| Mixed Symptoms, n(%)               | 9 (38)        | 9 (47)        | 0.52           |
| Mixed Episodes, n(%)               | 2 (8)         | 2 (11)        | 0.81           |
| Psychosis, n(%)                    | 3 (13)        | 5 (25)        | 0.28           |
| Suicide attempts, n(%)             | 12 (50)       | 8 (38)        | 0.42           |
| Anxiety disorder, n(%)             | 17 (68)       | 10 (46)       | 0.12           |
| Alcohol use disorder, n(%)         | 8 (32)        | 9 (41)        | 0.53           |
| Drug use disorder, n(%)            | 4 (16)        | 5(23)         | 0.56           |
| Depressive episodes, median (IQR)  | 9 (45)        | 10 (21)       |                |
| Hypomanic episodes, median (IQR)   | 8 (28)        | 20 (38)       |                |
|                                    | (n=16)        | n=(15)        | p              |
| AAO, mean (SD)                     | 17.19 (7.14)  | 14.53 (6.24)  | 0.28           |
| BMI, mean (SD)                     | 28.16 (6.99)  | 28.97 (2.86)  | 0.67           |
| Baseline depression, mean (SD)     | 12.50 (8.66)  | 18.93 (10.64) | 0.79           |
| Baseline mania, mean (SD)          | 1.25 (2.08)   | 4.20 (4.54)   | 0.03           |
| CTQ emotional abuse, mean (SD)     | 10.81 (6.73)  | 13.53 (5.34)  | 0.22           |
| CTQ physical abuse, mean (SD)      | 7.63 (4.52)   | 7.27 (3.56)   | 0.81           |
| CTQ sexual abuse, median (IQR)     | 5.5 (6)       | 6 (7)         | 0.68           |
| CTQ emotional neglect, mean (SD)   | 10.44 (5.75)  | 15.13 (6.44)  | 0.04           |
| CTQ physical neglect, mean (SD)    | 8.00 (1.75)   | 8.80 (2.51)   | 0.31           |
| FACES II cohesion, mean (SD)       | 3.25 (1.92)   | 4.00 (2.10)   | 0.31           |
| FACES II adaptability, mean (SD)   | 3.25 (1.95)   | 3.53 (1.96)   | 0.69           |
| LEOS Undesirable events, mean (SD) | 0.94 (0.93)   | 1.60 (1.50)   | 0.16           |
| LEC life events scale, mean (SD)   | 5.00 (3.83)   | 4.60 (4.10)   | 0.78           |
| Neuroticism, mean (SD)             | 62.38 (12.64) | 71.73 (11.13) | 0.04           |
| Extraversion, mean (SD)            | 47.13 (10.60) | 44.47 (9.87)  | 0.48           |
| Openness, mean (SD)                | 54.38 (11.46) | 59.13 (11.08) | 0.25           |
| Agreeableness, mean (SD)           | 45.63 (14.31) | 55.33 (12.78) | 0.06           |
| Conscientiousness, mean (SD)       | 41.00 (12.14) | 43.07 (15.57) | 0.68           |

Abbreviations: Childhood Trauma Questionnaire (CTQ); Life Events Occurrence Survey (LEOS); Life Events Checklist (LEC); Family Adaptability and Cohesion Evaluation Scale II (FACES II); Neuroticism, Extraversion, Openness, Agreeableness and Conscientiousness from the Five Factor model NEO-Personality Index – Revised (NEO-PI-R). Baseline depression symptoms were measured with the Hamilton Depression Rating Scale (HDRS-29), baseline manic symptoms were measured with the Young Mania Rating Scale (YMRS).

<sup>a</sup> comparisons between groups done using independent sample t-test for normally distributed continuous variables, and the Mann-Whitney U test for non-normally distributed continuous

variables (depressive, and hypomanic episodes, CTQ sexual abuse); Pearson Chi-square used for categorical variables.

Supplementary eTable 3d. Clinical Characteristics in BD Group by Gender and BD diagnosis: Comparing BPII Men With And Without Migraine

| Characteristic                      | (n=12)               | (n=7)               | p <sup>a</sup> |
|-------------------------------------|----------------------|---------------------|----------------|
| Rapid Cycling, n(%)                 | 4 (33)               | 3 (43)              | 1.00           |
| Mixed Symptoms, n(%)                | 3 (27)               | 2 (29)              | 1.00           |
| Mixed Episodes, n(%)                | 2 (18)               | 2 (29)              | 0.61           |
| Psychosis, n(%)                     | 2 (18)               | 0                   | 0.50           |
| Suicide Attempts, n(%)              | 4 (36)               | 2 (29)              | 0.73           |
| Anxiety Disorder, n(%)              | 3 (25)               | 4 (57)              | 0.16           |
| Alcohol Use Disorder, n(%)          | 3 (25)               | 4 (57)              | 0.16           |
| Drug Use Disorder, n(%)             | 1 (8)                | 1 (14)              | 1.00           |
| Depressive episodes, median (IQR)   | 5 (27)               | 20 (37)             | 0.10           |
| Hypomanic episodes, median (IQR)    | 20 (37)              | 20 (24)             | 0.53           |
|                                     | <u>(n=5)</u>         | <u>n=(3)</u>        | <u>p</u>       |
| AAO, mean (SD)                      | 16.40 (5.13)         | 20.00 (4.00)        | 0.34           |
| BMI, mean (SD)                      | 27.42 (3.19)         | 25.47 (0.67)        | 0.35           |
| Baseline depression, mean (SD)      | 6.60 (5.86)          | 18.00 (13.00)       | 0.13           |
| Baseline mania, mean (SD)           | 3.80 (5.85)          | 1.67 (1.53)         | 0.57           |
| CTQ emotional abuse, mean (SD)      | 8.20 (2.78)          | 10.00 (2.65)        | 0.40           |
| CTQ physical abuse, mean (SD)       | 5.60 (0.89)          | 6.33 (1.53)         | 0.41           |
| CTQ sexual abuse, median (IQR)      | 0 (0)                | 7 (0)               | 0.14           |
| CTQ emotional neglect, mean (SD)    | 10.40 (4.04)         | 11.33 (7.10)        | 0.82           |
| CTQ physical neglect, mean (SD)     | 7.80 (1.10)          | 8.33 (1.53)         | 0.58           |
| FACES II cohesion, mean (SD)        | 5.60 (2.30)          | 3.67 (2.31)         | 0.29           |
| FACES II adaptability, mean (SD)    | 5.20 (2.05)          | 3.67 (2.31)         | 0.36           |
| LEOS Undesirable events, mean (SD)  | 1.00 (1.00)          | 1.33 (1.53)         | 0.72           |
| LEC life events scale, mean (SD)    | 3.80 (2.39)          | 7.67 (6.43)         | 0.25           |
| Neuroticism, mean (SD)              | 58.20 (14.41)        | 74.33 (5.51)        | 0.12           |
| Extraversion, mean (SD)             | 59.00 (13.77)        | 50.33 (2.52)        | 0.34           |
| Openness, mean (SD)                 | 62.40 (15.24)        | 60.67 (19.09)       | 0.89           |
| Agreeableness, mean (SD)            | 43.00 (20.68)        | 44.33 (9.24)        | 0.92           |
| <u>Conscientiousness, mean (SD)</u> | <u>46.00 (16.75)</u> | <u>41.67 (7.51)</u> | <u>0.69</u>    |

Abbreviations: Childhood Trauma Questionnaire (CTQ); Life Events Occurrence Survey (LEOS); Life Events Checklist (LEC); Family Adaptability and Cohesion Evaluation Scale II (FACES II); Neuroticism, Extraversion, Openness, Agreeableness and Conscientiousness from the Five Factor model NEO-Personality Index – Revised (NEO-PI-R). Baseline depression symptoms were measured with the Hamilton Depression Rating Scale (HDRS-29), baseline manic symptoms were measured with the Young Mania Rating Scale (YMRS).

<sup>a</sup> comparisons between groups done using independent sample t-test for normally distributed continuous variables, and the Mann-Whitney U test for non-normally distributed continuous



variables (depressive, and hypomanic episodes, CTQ sexual abuse); Pearson Chi-square used for categorical variables.
